# Supplementary material for: Adsorption properties of NO molecules on the hexagonal LaCoO3(0 0 1) surface: a density functional theory study
Source: Royal Society of Chemistry journal article supplement (doi:10.1039/c7ra03213g), 2017-01-01
Supplement: c7ra03213g1.pdf [file c7ra03213g1.pdf]

**Adsorption properties of NO molecule on the hexagonal  $\text{LaCoO}_3$**

**(0 0 1) surface: A Density Functional Theory Study**

Zhijie Liu, Yanxin Wang, Hongwei Gao\*

*Key Laboratory of Plant Resources and Chemistry in Arid Regions, Xinjiang*

*Technical Institute of Physics and Chemistry, Chinese Academy of Sciences, Urumqi*

*830011, China*

---

\*Corresponding author: Tel.: +86-991-3858319; Fax : +86-991-3858319; E-mail: gaohongw369@ms.xjb.ac.cn

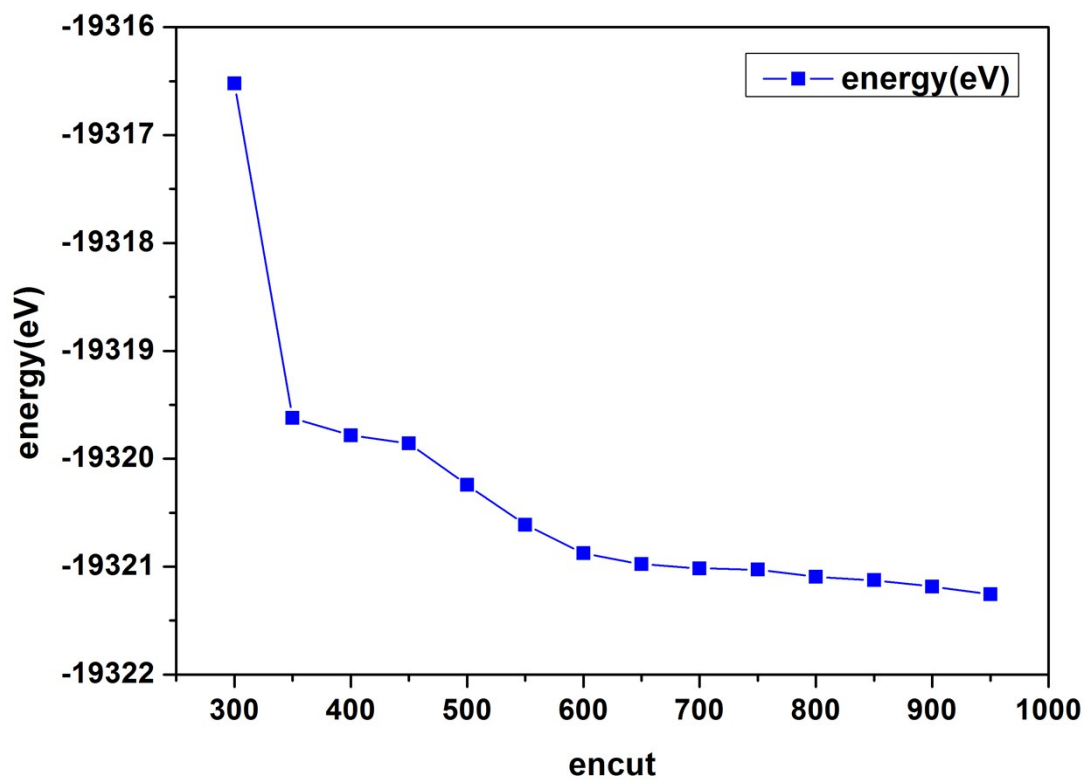

**Figure S1.** The Orbital Cutoff of  $\text{LaCoO}_3$  be tested by geometry optimization for using CASTEP code.

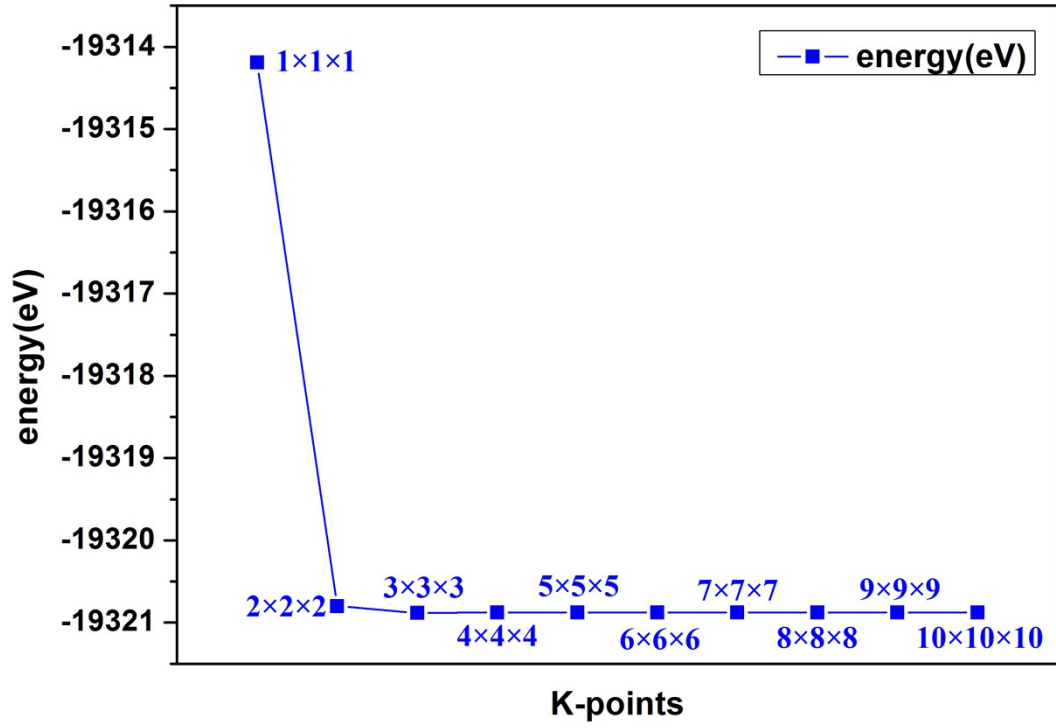

Figure S2. Convergence test image of K-points of the LaCoO<sub>3</sub>.
